# Supplementary material for: Highly Luminescent and Photostable Core/Shell/Shell ZnSeS/Cu:ZnS/ZnS Quantum Dots Prepared via a Mild Aqueous Route
Source: MDPI journal article supplement (doi:10.3390/nano12183254), 2022-09-19
Supplement: s1 [file s1]

## Supporting Information

Article

# Highly Luminescent and Photostable Core/Shell/Shell ZnSeS/Cu:ZnS/ZnS Quantum Dots Prepared via a Mild Aqueous Route

Salima Mabrouk <sup>1,2</sup>, Hervé Rinnert <sup>3</sup>, Lavinia Balan <sup>4</sup>, Jordane Jasnowski <sup>5</sup>, Sébastien Blanchard <sup>6</sup>, Ghouti Medjahdi <sup>3</sup>, Rafik Ben Chaabane <sup>2</sup> and Raphaël Schneider <sup>1,\*</sup>

<sup>1</sup> Université de Lorraine, CNRS, LRGP, F-54000 Nancy, France

<sup>2</sup> Laboratoire Interfaces et Matériaux Avancés, LIMA, LR011ES55, Faculté des Sciences de Monastir, Avenue de l'Environnement, Monastir 5019, Tunisia

<sup>3</sup> Université de Lorraine, CNRS, IJL, F-54000 Nancy, France

<sup>4</sup> CEMHTI-UPR 3079 CNRS, Site Haute Température, 1D Avenue de la Recherche Scientifique, 45071 Orléans, France

<sup>5</sup> Université de Lorraine, LIBio, F-54000 Nancy, France

<sup>6</sup> Sorbonne Université, CNRS, Institut Parisien de Chimie Moléculaire, IPCM, F-75005 Paris, France

\* Correspondence: raphael.schneider@univ-lorraine.fr; Tel.: +33-372743790

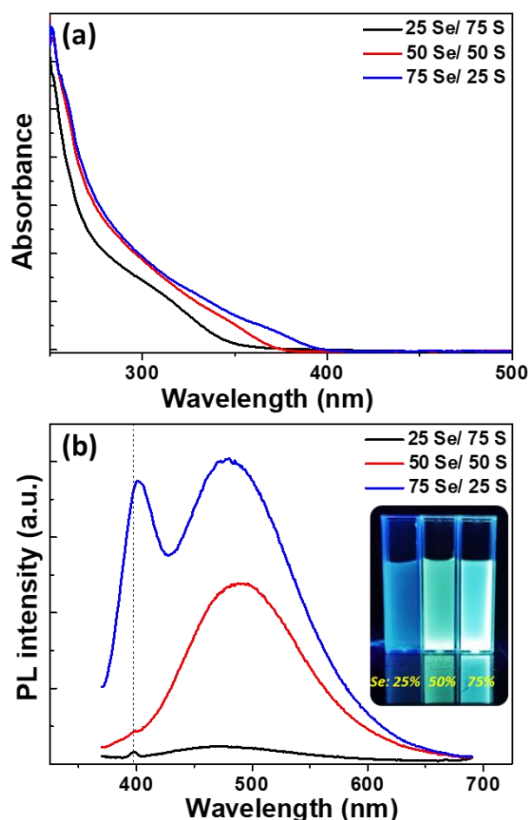

**Figure S1.** (a) UV-visible absorption and (b) PL emission spectra of ZnSeS QDs when varying the Se/S molar ratio. The inset of (b) is a photograph taken under UV illumination of aqueous dispersions of the dots.

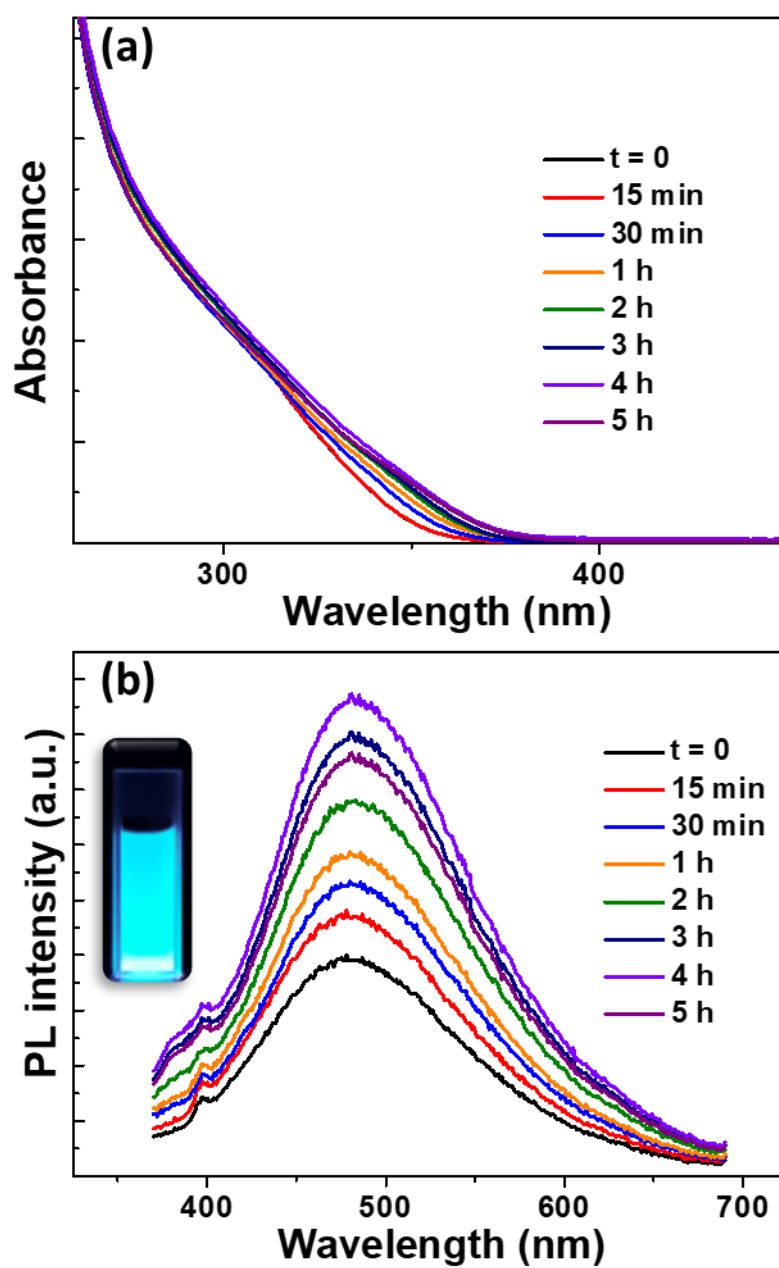

**Figure S2.** (a) UV-visible absorption and (b) PL emission spectra at different reaction stages. The inset of (b) is a photograph taken under UV illumination of aqueous dispersions of the dots.

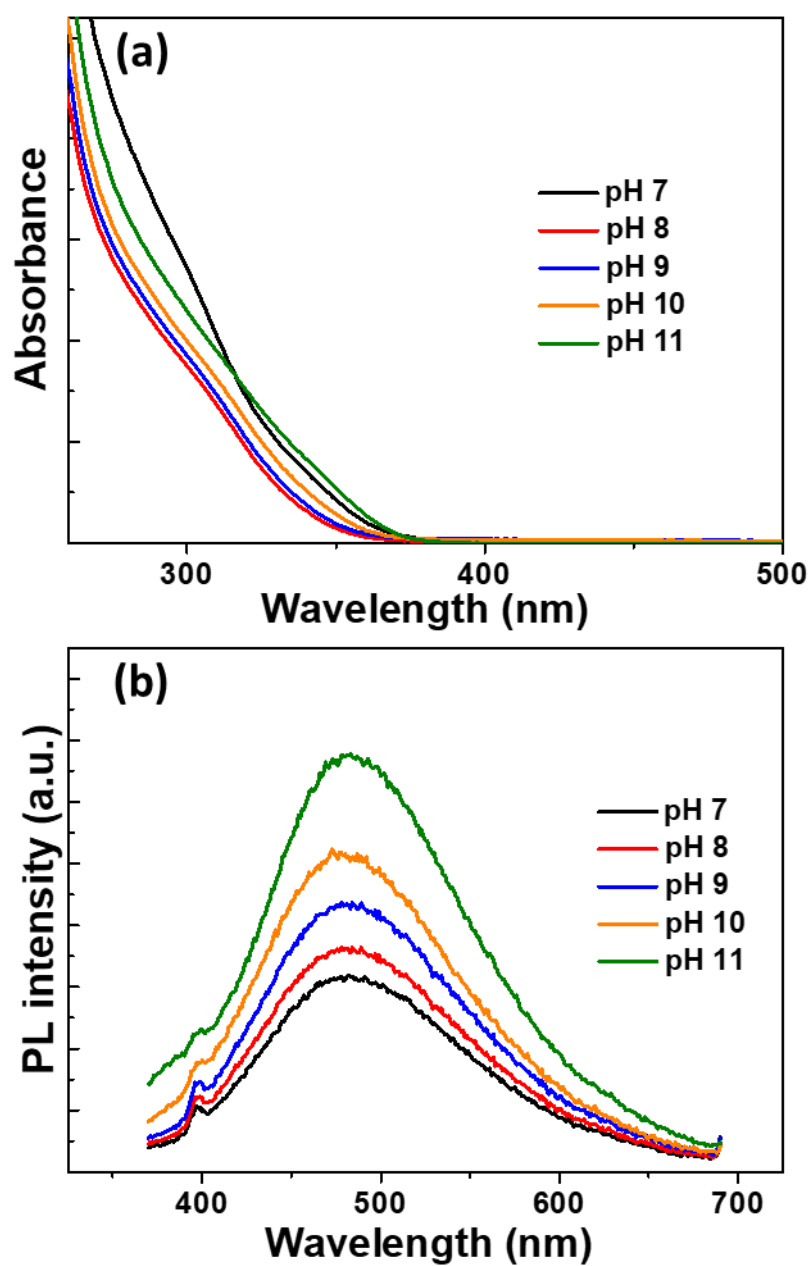

**Figure S3.** (a) UV-visible absorption and (b) PL emission spectra of ZnSeS QDs when varying the pH of the reaction. Reactions were conducted for 4 h using a Se/S ratio of 50/50.

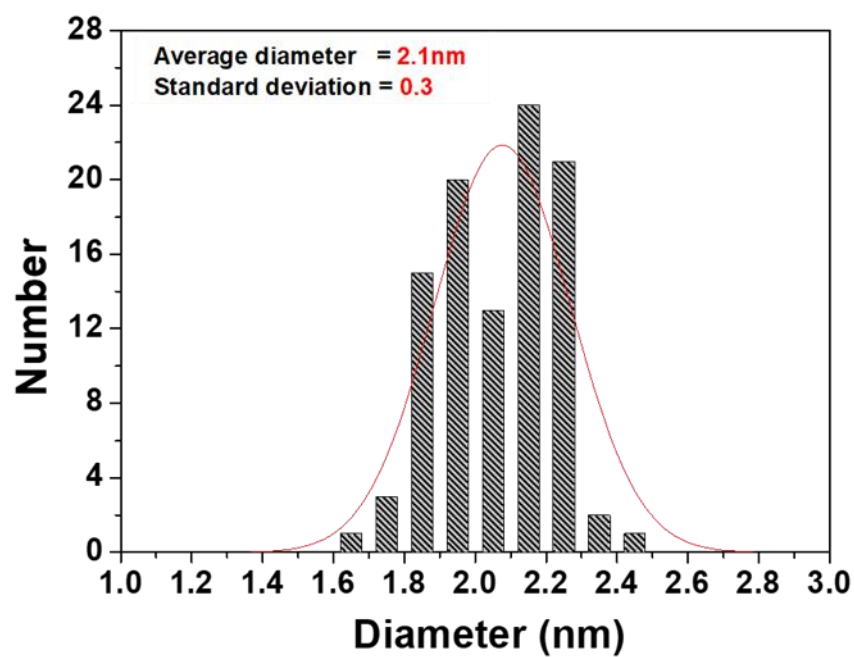

**Figure S4.** Particle size distribution expressed in number of ZnSeS/Cu(2.5):ZnS/ZnS (2ML) QDs determined by TEM.

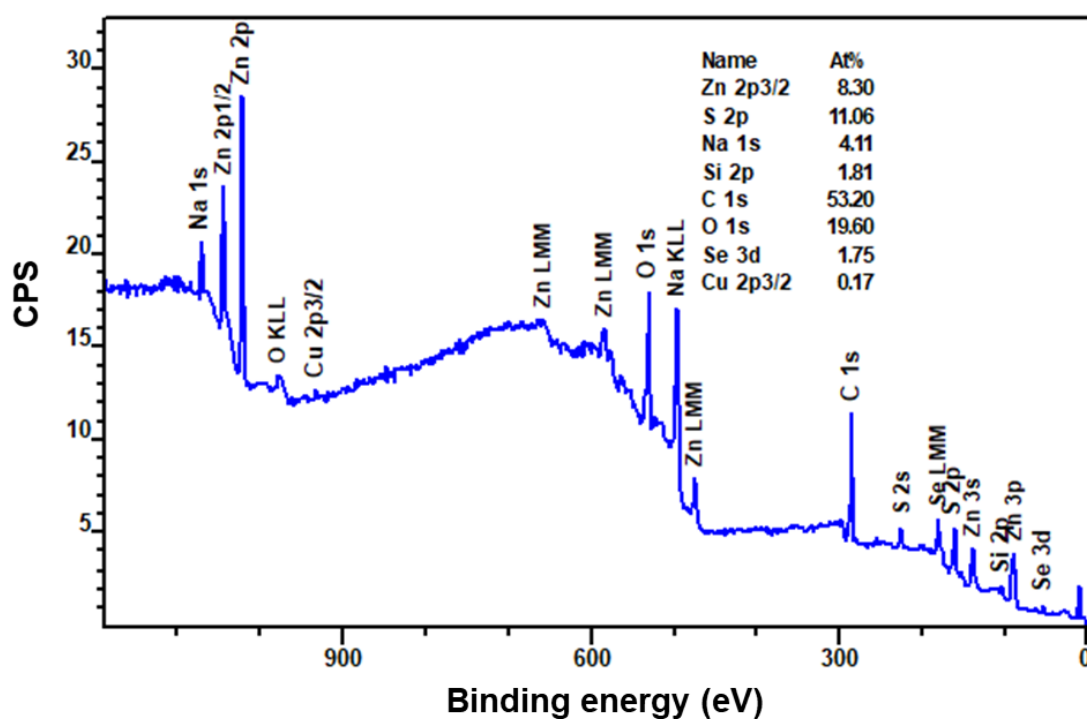

**Figure S5.** XPS overview spectrum of ZnSeS/Cu(2.5):ZnS/ZnS QDs.

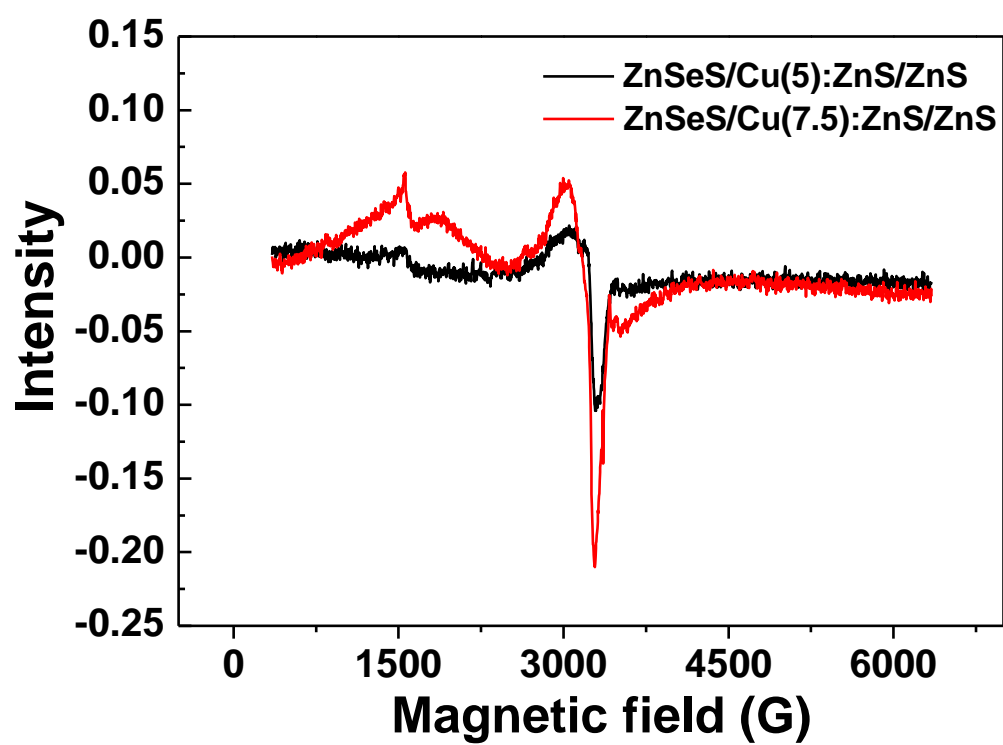

**Figure S6.** EPR spectra of ZnSeS/Cu(5 and 7.5):ZnS/ZnS QDs recorded at room temperature.

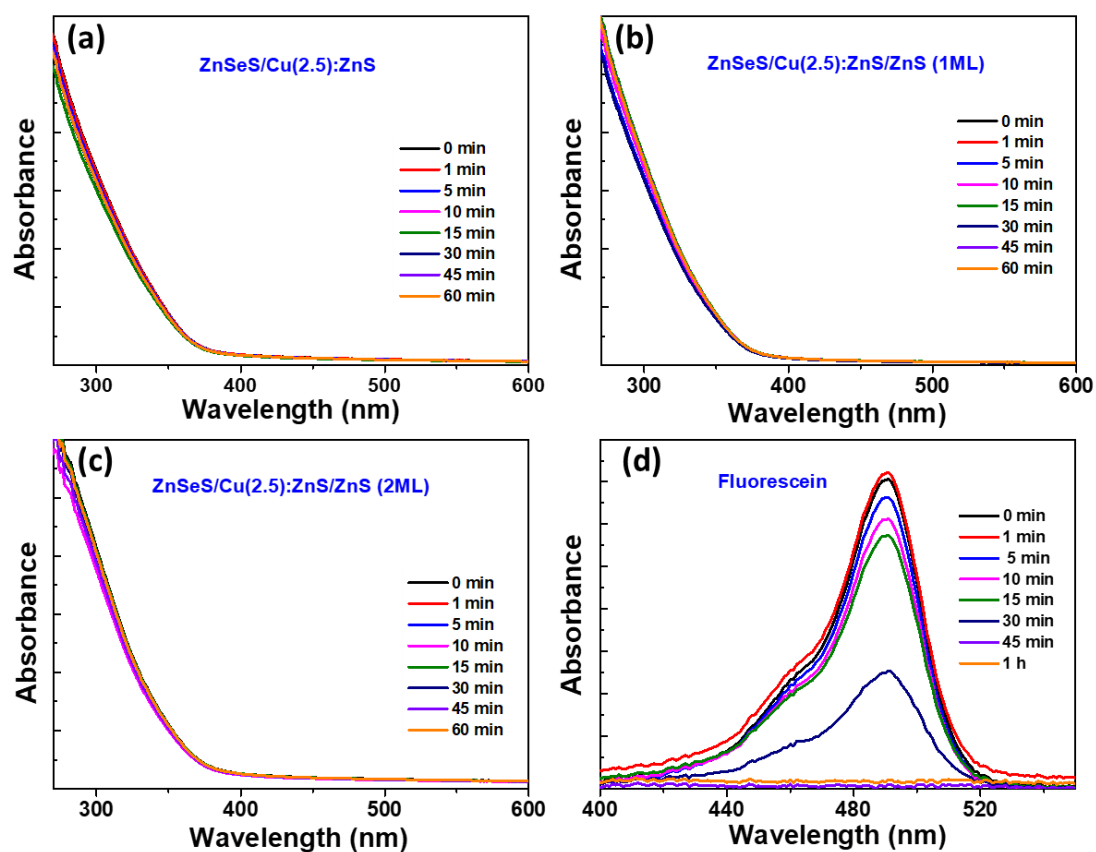

**Figure S7.** Evolution of UV-visible absorption spectra of (a) ZnSeS/Cu(2.5):ZnS, (b-c) of ZnSeS/Cu(2.5):ZnS/ZnS QDs and of (d) fluorescein during the continuous irradiation of a Hg/Xe lamp.

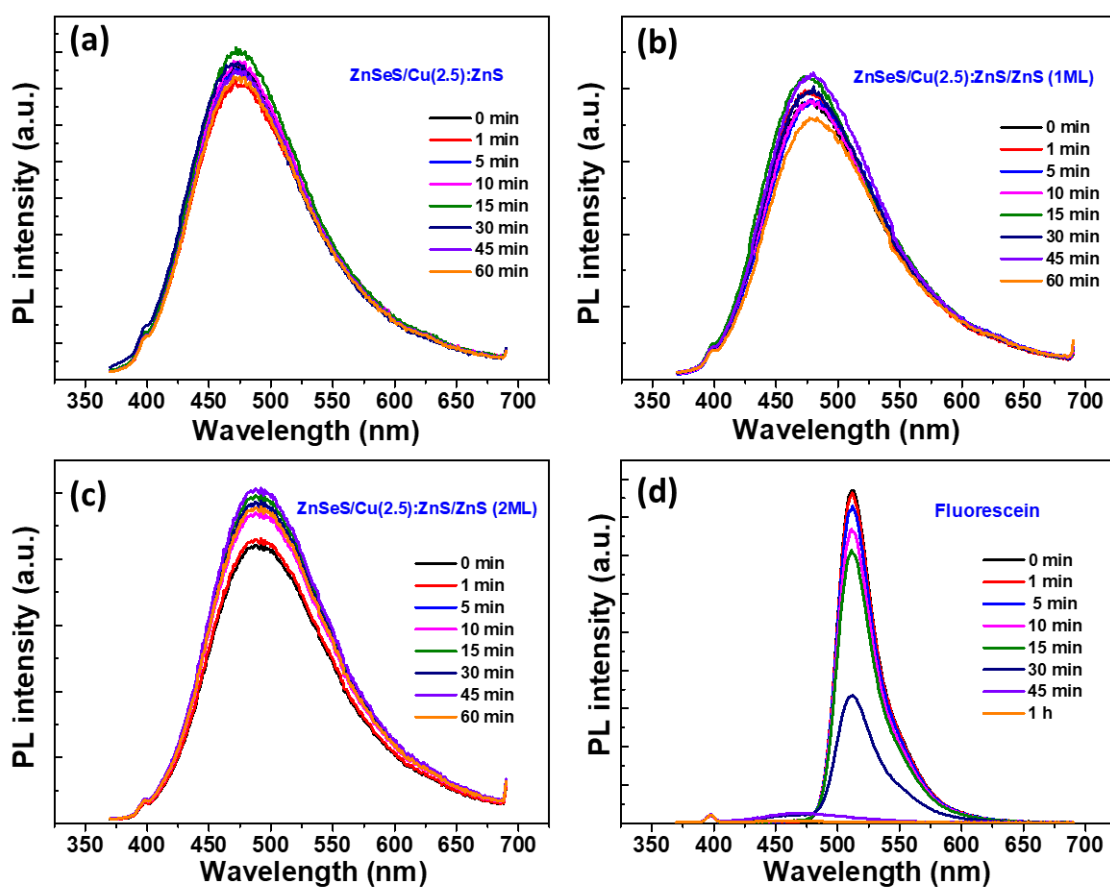

**Figure S8.** Evolution of PL emission spectra of (a) ZnSeS/Cu(2.5):ZnS, (b-c) of ZnSeS/Cu(2.5):ZnS/ZnS QDs and of (d) fluorescein during the continuous irradiation of a Hg/Xe lamp.
